# Supplementary material for: First Report of IMI-2-Producing Enterobacter bugandensis and CTX-M-55-Producing Escherichia coli isolated from Healthy Volunteers in Tunisia
Source: MDPI journal article supplement (doi:10.3390/antibiotics12010116), 2023-01-08
Supplement: s1 [file s1]

**Table S1** : Analysis of mutations in ACTi gene after comparison with ACT-77 (WP\_060573544.1)

| Mismatches and positions | Position | Accession number of similar proteins with similar mismatches         |
|--------------------------|----------|----------------------------------------------------------------------|
| H-N                      | P35      | WP_061099492.1                                                       |
| E-D                      | P115     | WP_192986658.1<br>WP_061099492.1<br>WP_164461280.1<br>WP_059354427.1 |
| R-K                      | P 203    | WP_061099492.1                                                       |
| P-S                      | P 267    | WP_193357670.1                                                       |

**Table S2** : Analysis of mutations in *qnr* gene in *E. bugandensis* 9i genome sequence

| Mismatches and positions | Position | Accession number of similar proteins with similar mismatches |
|--------------------------|----------|--------------------------------------------------------------|
| G—S                      | P7       | WP_218307411.1                                               |
| A-D                      | P94      | NA                                                           |
| A-V                      | P99      | (GJK31478.1)                                                 |
|                          |          | WP_039992288.1                                               |

**Table S3:** Primers of the target  $\beta$ -lactamase genes

| $\beta$ -lactamases    | Primer sequence (5'-3')                                | Size (pb) | Reference |
|------------------------|--------------------------------------------------------|-----------|-----------|
| TEM                    | F :ATTCTTGAAGACGAAAGGGC<br>R :ACGCTCAGTGGAACGAAAAC     | 1150 bp   | [42]      |
| SHV                    | F :CACTCAAGGATGTATTG TG<br>R:TTAGCGTTGCCAGTGCTCG       | 885       |           |
| OXA-1                  | F :ACACAATACATATCAACTTCGC<br>R :AGTG TGTTTAGAATGGTGATC | 813       |           |
| CTX-M-1 group          | F:GTTACAATGTGTGAGAAGCAG<br>R:CCGTTTC CGCTATTACAAA      | 1041      |           |
| CTX-M-8 group          | F:TGATGAGACATCGCGTTAAG<br>R:TAACCGTCGGTG ACGATTTT      | 875       |           |
| CTX-M-9 group          | F:GTG ACAAAGAGAGTGCAACGG<br>R:ATGATTCTCGCCGCTGA AGCC   | 857       |           |
| CTX-M-10               | F:CC GCGCTACACTTTGTGGC<br>R:TTACAAACCGTTGGTGA CG       | 944       |           |
| CMY1,CMY-8<br>toCMY-11 | F :GCTGCTCAAGGAGCACAGGAT<br>R :CACATTGACATAGGTGTGGTGC  | 520       | [43]      |
| CMY-2 to CMY-7         | F :TGGCCAGAACTGACAGGCAAA<br>R :TTTCTCCTGAACGTGGCTGGC   | 462       |           |
| DHA-1, DHA-2           | F :AACTTTCACAGGTGTGCTGGGT<br>R :CCGTACGCATACTGGCTTTGC  | 405       |           |
| ACT-1                  | F:TCGGTAAAGCCGATGTTGCGG<br>R:CTTCCACTGCGGCTGCCAGTT     | 302       |           |
| IMP                    | F : GGAATAGAGTGGCTTAAYTCTC<br>R : GGTTTAAYAAAACAACCACC | 232       | [44]      |
| SPM                    | F: AAAATCTGGGTACGCAAACG<br>R : ACATTATCCGCTGGAACAGG    | 271       |           |
| VIM                    | F : GATGGTGTTTGGTCGCATA<br>R : CGAATGCGCAGCACCAG       | 390       |           |
| OXA-48                 | F : GCGTGGTTAAGGATGAACAC                               | 438       |           |

|             |                           |     |      |
|-------------|---------------------------|-----|------|
|             | R : CATCAAGTTCAACCCAACCG  |     |      |
| GIM         | F: TCGACACACCTTGGTCTGAA   | 477 |      |
|             | R: AACTTCCAACCTTTGCCATGC  |     |      |
| SIM         | F: TACAAGGGATTCTGGCATCG   | 570 |      |
|             | R: TAATGGCCTGTCCCATGTG    |     |      |
| NDM         | F : GGTTCGGCGATCTGGTTTTTC | 621 |      |
|             | R : CGGAATGGCTCATCACGATC  |     |      |
| KPC         | F: CGTCTAGTTCTGCTGTCTTG   | 798 |      |
|             | R: CTTGTCATCCTTGTTAGGCG   |     |      |
| IMI1-3 /NMC | F: TCGGGTCGATTGGAGATAAA   | 399 | [45] |
|             | R: CGATTCTTGAAGCTTCTGCG   |     |      |
| SME1-3      | F: ACTTTGATGGGAGGATTGGC   | 551 |      |
|             | R: ACGAATTCGAGCATCACCAG   |     |      |
| GES1-9      | F: GCTTCATTACGCACTATT     | 323 |      |
|             | R: CGATGCTAGAAACCGCTC     |     |      |

**Table S4:** Primers of the target antimicrobial resistance genes.

| Target gene(s) or region | Primer sequence (5'-3')                                        | Size (pb) | Reference |
|--------------------------|----------------------------------------------------------------|-----------|-----------|
| tetA                     | F:GTAATTCTGAGCACTGTCTGC<br>R:CTGCCTGGACAACATTGCTT              | 937       | [39]      |
| tetB                     | F:CTCAGTATTCCAAGCCTTTG<br>R:CTAAGCACTTGTCTCCTGTT               | 416       |           |
| sul1                     | F:TGGTGACGGTGTTCTGGCATTCT<br>R:GCGAGGGTTTCCGAGAAGGTG           | 789       |           |
| sul2                     | F:CGGCATCGTCAACATAACC<br>R:GTGTGCGGATGAAGTCAG                  | 722       |           |
| sul3                     | F: CATTCTAGAAAACAGTCGTAGTTCTG<br>R:CATCTGCAGCTAACCTAGGGCTTTGGA | 990       |           |
| Int1                     | F:GGGTCAAGGATCTGGATTTCTG<br>R: ACATGGGTGTAAATCATCGTC           | 483       |           |
| aac(3)-II                | F:ACTGTGATGGGATACGCGTC                                         | 237       |           |

|            |                                                     |     |
|------------|-----------------------------------------------------|-----|
|            | R:CTCCGTCAGCGTTTCAGCTA                              |     |
| aac(3)-IV  | F:CTTCAGGATGGCAAGTTGGT<br>R:TCATCTCGTTCTCCGCTCAT    | 286 |
| qnrA       | F:AGAGGATTCTCACGCCAGG<br>R:TGCCAGGCACAGATCTTGAC     | 580 |
| qnrB       | F:GATCGTGAAAGCCAGAAAGG<br>R:ACGATGCCTGGTAGTTGTCC    | 469 |
| qnrS       | F:GCAAGTTCATTGAACAGGGT<br>R:TCTAAACCGTCGAGTTCGGCG   | 550 |
| qepA       | F:GCAGGTCCAGCAGCGGGTAG<br>R:GGACATCTACGGCTTCTTCG    | 617 |
| aac(6')-Ib | F:TTGCGATGCTCTATGAGTGGCTA<br>R:CTCGAATGCCTGGCGTGTTT | 482 |

**Table S5.** ANI values of *E. bugandensis* 9i isolate with all genome sequences of *E. bugandensis* deposited in genbank (as of December 2022).

| Genome assebmy                | ANI(%) |
|-------------------------------|--------|
| GCF 001054435.1_ASM105443v1   | 95.23  |
| GCF_023750845.1_ASM2375084v1  | 95.20  |
| GCA_023750905.1_ASM2375090v1  | 95.16  |
| GCF_023374275.1_ASM2337427v1  | 95.15  |
| GCF 023154875.1_ASM2315487v1  | 95.15  |
| GCA 023752545.1_ASM2375254v1  | 95.12  |
| GCA 023152755.1_ASM2315275v1  | 95.10  |
| GCA_023751035.1_ASM2375103v1  | 95.09  |
| GCA 021287345.1_ASM2128734v1  | 95.08  |
| GCA 023151965.1_ASM2315196v1  | 95.08  |
| GCA_023153675.1_ASM2315367v1  | 95.08  |
| GCA_023153675.1_ASM2315367v1  | 95.08  |
| GCA 000515295.1_ASM51529v1    | 95.06  |
| GCF 000515295.1_ASM51529v1    | 95.06  |
| GCA 023151735.1_ASM2315173v1  | 95.06  |
| GCA 021650125.1_ASM2165012v1  | 95.05  |
| GCA 023151725.1_ASM2315172v1  | 95.05  |
| GCA_023153975.1_ASM2315397v1  | 95.05  |
| GCA_023153975.1_ASM2315397v1  | 95.05  |
| GCF 903970915.1_ASM90397091v1 | 95.05  |
| GCF 903970835.1_ASM90397083v1 | 95.05  |
| GCA 018597305.1_ASM1859730v1  | 95.04  |

|                                          |       |
|------------------------------------------|-------|
| GCA 021650055.1 ASM2165005v1             | 95.03 |
| GCA 021650105.1 ASM2165010v1             | 95.03 |
| GCA_023154415.1_ASM2315441v1             | 95.02 |
| GCA_023154415.1_ASM2315441v1             | 95.02 |
| GCA_023750585.1_ASM2375058v1             | 95.02 |
| GCF 900075815.1 12082 4 48               | 95.02 |
| GCF 023752545.1 ASM2375254v1             | 95.02 |
| GCF_023750585.1_ASM2375058v1             | 95.02 |
| GCF 023154915.1 ASM2315491v1             | 95.02 |
| GCA 015278715.1 ASM1527871v1             | 95.01 |
| GCA 018597025.1 ASM1859702v1             | 95.01 |
| GCF_023750405.1_ASM2375040v1             | 95.01 |
| GCA 015137655.1 ASM1513765v1             | 95.00 |
| GCF 015137655.1 ASM1513765v1             | 95.00 |
| GCA 021650195.1 ASM2165019v1             | 95.00 |
| GCA 023151635.1 ASM2315163v1             | 95.00 |
| GCF 900324475.1 EB-247                   | 95.00 |
| GCA_023153995.1_ASM2315399v1             | 94.99 |
| GCA_023153995.1_ASM2315399v1             | 94.99 |
| GCF_023750245.1_ASM2375024v1_genomic.fna | 94.99 |
| GCA 019012175.1 ASM1901217v1             | 94.98 |
| GCA 020042625.1 ASM2004262v1             | 94.98 |
| GCA 018455145.1 PDT000712937.2           | 94.98 |
| GCA 021650155.1 ASM2165015v1             | 94.98 |
| GCA_023154055.1_ASM2315405v1             | 94.98 |
| GCA_023154055.1_ASM2315405v1             | 94.98 |
| GCF 900078165.1 11983 7 53               | 94.98 |
| GCA 015704655.1 ASM1570465v1             | 94.97 |
| GCA 023151665.1 ASM2315166v1             | 94.97 |
| GCA_023153835.1_ASM2315383v1             | 94.97 |
| GCA_023153835.1_ASM2315383v1             | 94.97 |
| GCA_023752225.1_ASM2375222v1             | 94.97 |
| GCA 017315445.1 ASM1731544v1             | 94.96 |
| GCA 018455045.1 PDT000712935.2           | 94.96 |
| GCA 023152215.1 ASM2315221v1             | 94.96 |
| GCA_023153645.1_ASM2315364v1             | 94.96 |
| GCA_023153645.1_ASM2315364v1             | 94.96 |
| GCA 018598145.1 ASM1859814v1             | 94.95 |
| GCA 023151655.1 ASM2315165v1             | 94.95 |
| GCA 020099255.1 ASM2009925v1             | 94.94 |
| GCA 023151825.1 ASM2315182v1             | 94.94 |

|                                          |       |
|------------------------------------------|-------|
| GCA_023153455.1_ASM2315345v1             | 94.94 |
| GCA_023153535.1_ASM2315353v1             | 94.94 |
| GCA_023153455.1_ASM2315345v1             | 94.94 |
| GCA_023153535.1_ASM2315353v1             | 94.94 |
| GCA 019815185.1_ASM1981518v1             | 94.93 |
| GCF 023155015.1_ASM2315501v1             | 94.93 |
| GCA 019351665.1_ASM1935166v1             | 94.92 |
| GCA 021286605.1_ASM2128660v1             | 94.92 |
| GCA 023152065.1_ASM2315206v1             | 94.91 |
| GCF 023154785.1_ASM2315478v1             | 94.91 |
| GCA 008641915.1_ASM864191v1              | 94.90 |
| GCA 020097235.1_ASM2009723v1             | 94.90 |
| GCA 023152155.1_ASM2315215v1             | 94.90 |
| GCF 025535875.1_ASM2553587v1             | 94.90 |
| GCA 008642035.1_ASM864203v1              | 94.89 |
| GCF 023154985.1_ASM2315498v1_genomic.fna | 94.89 |
| GCA 019046905.1_ASM1904690v1             | 94.88 |
| GCA 020099235.1_ASM2009923v1             | 94.87 |
| GCA 018165775.1_PDT001012905.1           | 94.87 |
| GCA 023151985.1_ASM2315198v1             | 94.87 |
| GCA 015278695.1_ASM1527869v1             | 94.86 |
| GCA 001054505.1_ASM105450v1              | 94.85 |
| GCF 001054505.1_ASM105450v1              | 94.85 |
| GCA 013366475.1_ASM1336647v1             | 94.85 |
| GCA 013366505.1_ASM1336650v1             | 94.85 |
| GCA 009647485.1_ASM964748v1              | 94.84 |
| GCA 013366535.1_ASM1336653v1             | 94.84 |
| GCA 023152455.1_ASM2315245v1             | 94.84 |
| GCA_023683925.1_PDT001324297.1           | 94.84 |
| GCA 013366465.1_ASM1336646v1             | 94.83 |
| GCA 015684375.1_PDT000538113.1           | 94.83 |
| GCA_023688005.1_PDT001324324.1           | 94.83 |
| GCA 013366435.1_ASM1336643v1             | 94.82 |
| GCA 020673825.1_ASM2067382v1             | 94.82 |
| GCA 023153335.1_ASM2315333v1             | 94.82 |
| GCA 021416825.1_ASM2141682v1             | 94.82 |
| GCA 021649885.1_ASM2164988v1             | 94.82 |
| GCA_023153955.1_ASM2315395v1             | 94.82 |
| GCA_023684465.1_PDT001323984.1           | 94.82 |
| GCA 013403425.1_ASM1340342v1             | 94.81 |

|                                |       |
|--------------------------------|-------|
| GCA 023152675.1 ASM2315267v1   | 94.81 |
| GCA_023583125.1_PDT001317070.1 | 94.81 |
| GCA_023588065.1_PDT001317179.1 | 94.81 |
| GCA 023153435.1 ASM2315343v1   | 94.80 |
| GCA 013403455.1 ASM1340345v1   | 94.79 |
| GCF 001022595.1 ASM102259v1    | 94.78 |
| GCA 020093305.1 ASM2009330v1   | 94.78 |
| GCA 023152415.1 ASM2315241v1   | 94.78 |
| GCF 023751985.1 ASM2375198v1   | 94.77 |
| GCA_023751375.1_ASM2375137v1   | 94.76 |
| GCA 023060615.1 ASM2306061v1   | 94.75 |
| GCF 900075565.1 12082 4 47     | 94.75 |
| GCA 008641635.1 ASM864163v1    | 94.74 |
| GCF 902161535.1 25426 7 289    | 94.71 |
| GCA 000958885.1 ASM95888v1     | 94.70 |
| GCA 021287275.1 ASM2128727v1   | 94.70 |
| GCA 001054625.1 ASM105462v1    | 94.69 |
| GCF 001054625.1 ASM105462v1    | 94.69 |
| GCA 023152335.1 ASM2315233v1   | 94.69 |
| GCA 023152785.1 ASM2315278v1   | 94.66 |
| GCA 001023305.1 ASM102330v1    | 94.64 |
| GCF 001023305.1 ASM102330v1    | 94.64 |
| GCA 023151855.1 ASM2315185v1   | 94.64 |
| GCF 025535675.1 ASM2553567v1   | 94.62 |
| GCA 021368735.1 PDT001216428.1 | 94.59 |
| GCA 019815105.1 ASM1981510v1   | 94.58 |
| GCF 024706625.1 ASM2470662v1   | 94.58 |
| GCA 000957065.1 ASM95706v1     | 94.56 |
| GCA 021368855.1 PDT001216423.1 | 94.55 |
| GCA 015684255.1 PDT000538163.1 | 94.50 |
| GCF 023751375.1 ASM2375137v1   | 94.50 |
| GCF 025536315.1 ASM2553631v1   | 94.49 |
| GCA 008642095.1 ASM864209v1    | 94.47 |
| GCF 025535395.1 ASM2553539v1   | 94.42 |
| GCF 903936295.1 ASM IMP80      | 94.41 |
| GCA 022553555.1 ASM2255355v1   | 94.35 |
| GCA 010590825.1 ASM1059082v1   | 93.91 |
| GCA 010597605.1 ASM1059760v1   | 92.43 |
| GCA 003964645.1 ASM396464v1    | 91.04 |
| GCA 001518395.1 ASM151839v1    | 90.96 |
| GCF 003964255.1 ASM396425v1    | 90.40 |
| GCA 002860705.1 ASM286070v1    | 90.23 |

|                             |       |
|-----------------------------|-------|
| GCA 002848105.1 ASM284810v1 | 89.89 |
| GCA 008641395.1 ASM864139v1 | 89.58 |
| GCA 008641475.1 ASM864147v1 | 89.51 |
| GCA 008640905.1 ASM864090v1 | 89.39 |
| GCA 008641595.1 ASM864159v1 | 89.38 |
| GCA 008640875.1 ASM864087v1 | 89.32 |
| GCA 008640915.1 ASM864091v1 | 89.23 |
| GCA 001518315.1 ASM151831v1 | 88.89 |
| GCA 004804395.1 ASM480439v1 | 88.85 |
| GCA 001055645.1 ASM105564v1 | 88.73 |
| GCA 003964825.1 ASM396482v1 | 88.69 |
| GCA 001057695.1 ASM105769v1 | 88.34 |
| GCA 002785865.1 ASM278586v1 | 87.98 |
| GCA 003965205.1 ASM396520v1 | 87.96 |
| GCA 001055805.1 ASM105580v1 | 87.90 |
| GCA 004801095.1 ASM480109v1 | 87.72 |
| GCA 001055835.1 ASM105583v1 | 87.65 |
| GCA 003985275.1 ASM398527v1 | 87.33 |
| GCA 004804375.1 ASM480437v1 | 86.26 |
| GCF 001054625.1 ASM105462v1 | 86.13 |
| GCA 003627555.1 ASM362755v1 | 85.97 |
| GCF 002890715.1 ASM289071v1 | 85.88 |
| GCA 002890765.1 ASM289076v1 | 85.83 |
| GCA 001631115.1 ASM163111v1 | 85.66 |
| GCF 001631115.1 ASM163111v1 | 85.66 |
| GCF 002890725.1 ASM289072v1 | 85.65 |
| GCF 002890755.1 ASM289075v1 | 85.65 |
|                             |       |
